# Supplementary material
Source: publisher figshare collection journal article supplement (https://frontiersin.figshare.com/ndownloader/files/25408958)
Supplement: Supplementary file [file 25408958]

## Supplementary Material

### Supplementary Figures

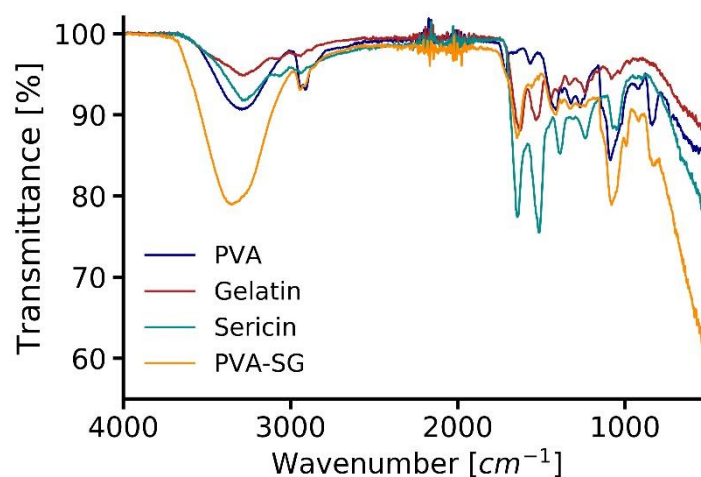

**Figure S1.** FTIR measurements of pure PVA, pure gelatin, and pure sericin before crosslinking and FTIR measurement of PVA-SG hydrogels after photopolymerization.

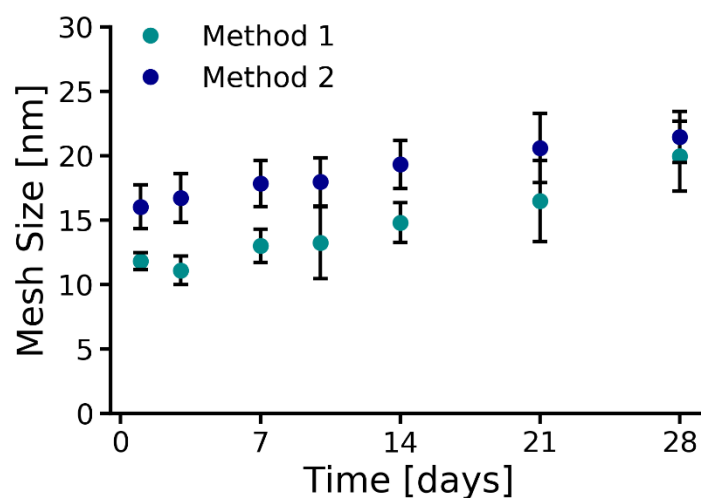

**Figure S2.** Calculation of the hydrogel mesh size with the two different methods.

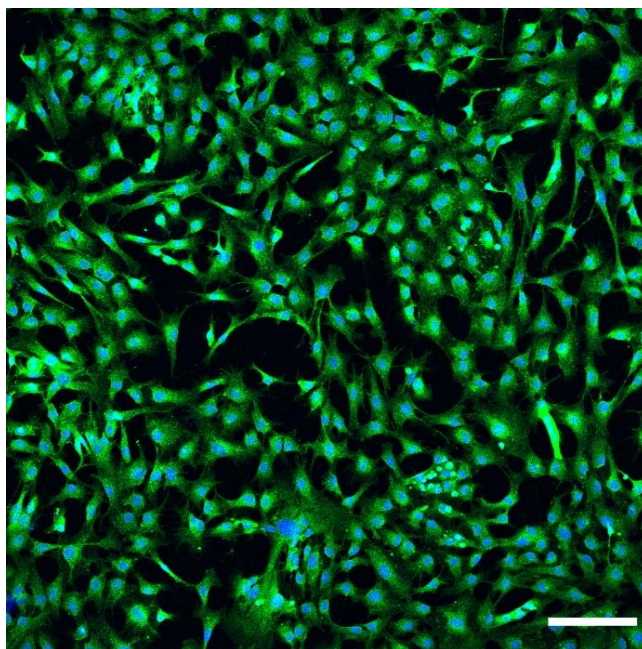

**Figure S3.** Confocal image of primary astrocytes shown in green (GFAP) as result of the purity of the culture. Scale bar = 150  $\mu\text{m}$ .

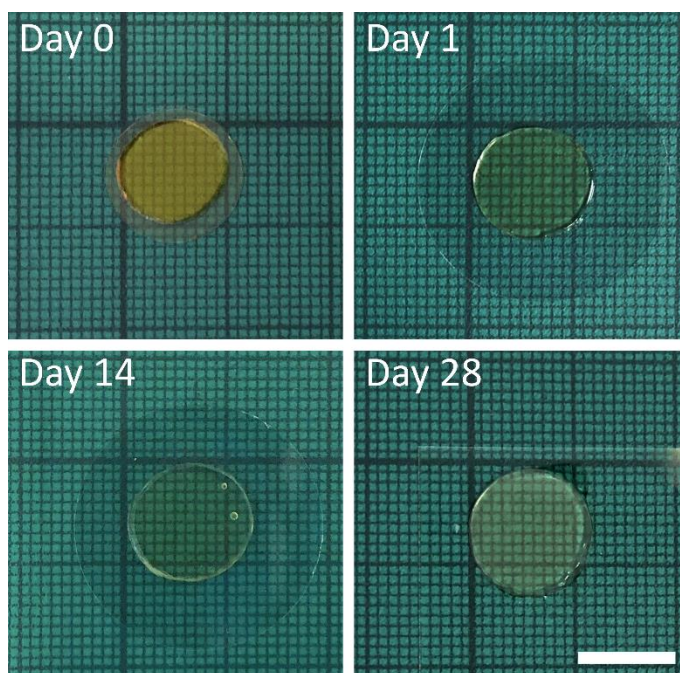

**Figure S4.** Representative images of 10 wt % PVA-SG hydrogels at different time points: right after photopolymerization (Day 0), and 1, 14, and 28 days after incubation in DPBS at 37°C.

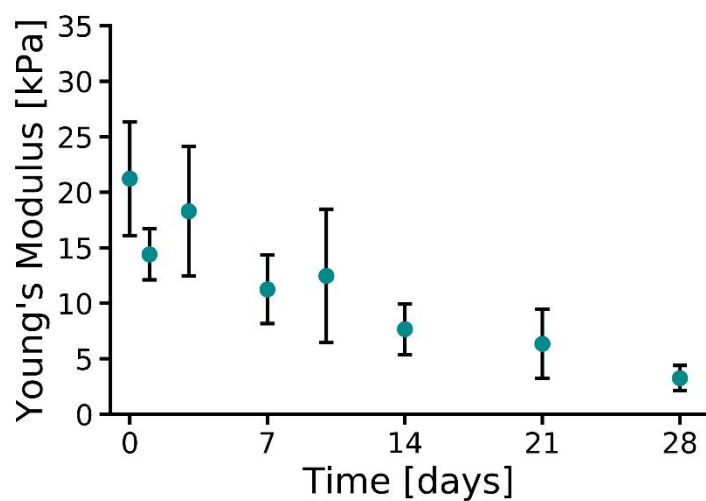

**Figure S5.** Young's moduli of PVA-SG hydrogels obtained with bulk compression measurements showing a decrease over time. N = 3.

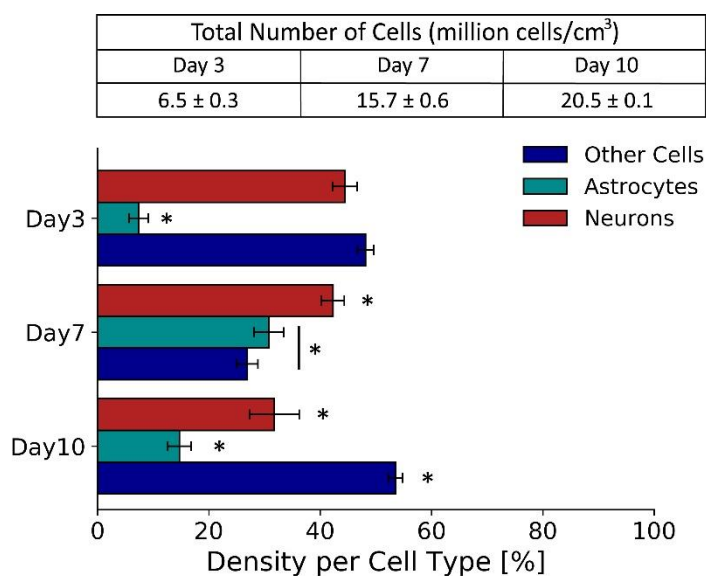

**Figure S6.** Cytocompatibility of ventral mesencephalic (VM) mixed cell population in 10 wt % PVA-SG hydrogels.
